# Supplementary material
Source: PubMed Central journal article supplement (PMC3970089)

**Supplementary Table 1.** Overview of all identified calcium dependent phosphorylated proteins and EGTA dependent phosphorylated proteins.

### Calcium

| #  | ID            | AGI code                | Description                                 | Species | pro-Q | p-Thr | PhosPhat | Experiment      |
|----|---------------|-------------------------|---------------------------------------------|---------|-------|-------|----------|-----------------|
| 1  | PsaN          | At5g64040               | Subunit N of photosystem I                  | At      | 4     | 4     | y        | (3)(4)(5)(6)(7) |
| 2  | CAS           | At5g23060               | 'Calcium sensing' protein                   | Ps/At   | 2     | 1     | y        | (1)(2)(4)       |
| 3  | VAR1/<br>VAR2 | At5g42270/<br>At2G30950 | Variegated 1 and 2, FtsH proteases          | Ps/At   | 2     | 0     | y/n      | (1)(4)          |
| 4  | PsbP-1        | At1g06680               | Subunit P-1 of photosystem II               | At      | 1     | 1     | y        | (2)(7)          |
| 5  | PsaH-2        | At1g52230               | Subunit H-2 of photosystem I                | At      | 1     | 1     | n        | (3)(4)          |
| 6  | PsbO-1        | At5g66570               | Subunit O-1 of photosystem II               | At      | 0     | 1     | n        | 7               |
| 7  | PsbQ-2        | At4g05180               | Subunit Q-2 of photosystem II               | At      | 0     | 1     | y        | 3               |
| 8  | PsbQ-1        | At4g21280               | Subunit Q-1 of photosystem II               | At      | 0     | 1     | y        | 3               |
| 9  | PsaC          | AtCg01060               | Subunit C of photosystem I                  | At      | 0     | 1     | n        | 7               |
| 10 | PsaP          | At2g46820               | Subunit P of photosystem I                  | At      | 1     | 0     | y        | 4               |
| 11 | ATPF          | AtCg00130               | ATPase subunit F                            | At      | 0     | 1     | n        | 3               |
| 12 | PTAC16        | At3g46780               | Plastid transcriptionally active 16         | At      | 0     | 1     | y        | 6               |
| 13 | Unknown1      | At4g27700               | Cell cycle control phosphatase superfamily  | At      | 0     | 1     | n        | 7               |
| 14 | Unknown2      | At3g63170               | Chalcone-flavanone isomerase family protein | At      | 0     | 1     | n        | 7               |

### EGTA

| # | ID       | AGI code  | Description                                                   | Species | pro-Q | p-Thr | PhosPhat | Experiment |
|---|----------|-----------|---------------------------------------------------------------|---------|-------|-------|----------|------------|
| 1 | ATPC1    | At4g04640 | ATPase subunit gamma                                          | At      | 1     | 0     | y        | 4          |
| 2 | FNR2     | At1g20020 | ferredoxin:NADP(H) oxidoreductase 2                           | At      | 0     | 1     | n        | 6          |
| 3 | Unknown3 | At2g37660 | 3-beta hydroxysteroid dehydrogenase /isomerase family protein | At      | 0     | 1     | y        | 7          |
| 4 | PsaG     | At1g55670 | Subunit G of photosystem I                                    | At      | 0     | 1     | n        | 2          |
| 5 | MFP1     | At3g16000 | MAR binding filament-like protein 1                           | At      | 0     | 1     | y        | 3          |

Indicated is in which species the proteins were identified (At = *Arabidopsis thaliana*; Ps = *Pisum sativum*), which stain was used to reveal the phosphorylated proteins (Pro-Q = Pro-Q Diamond phosphoprotein gel stain; pThr = phosphor-Threonine specific antibody), if the protein is included in the phospho-peptide database PhosPhat 3.0 (Durek *et al.*, 2010; Heazlewood *et al.*, 2008), and in which experiment the protein was identified. Images to the seven experiments are included in the supplementary figures.

**Suppl. Fig. S1.** Experiment 1. Pea thylakoid proteins phosphorylated in the presence of 1 mM  $\text{Ca}^{2+}$  or 1 mM EGTA. Phosphorylated proteins were revealed with Pro-Q Diamond phosphoprotein gel stain and subsequently the gel was stained with CBB. Identified proteins are the FtsH protease, Variegated 1 (VAR1) and 'Calcium sensing' protein (CAS).

**Suppl. Fig. S2.** Experiment 2. Arabidopsis thylakoid proteins phosphorylated in the presence of 250  $\mu\text{M}$   $\text{Ca}^{2+}$  or 250  $\mu\text{M}$  EGTA. Phosphorylated proteins were revealed with a phosphothreonine specific antibody and subsequently the gel was silver-stained. Identified proteins are 'Calcium sensing' protein (CAS), subunit P-1 of photosystem II (PsbP-1) and subunit G of photosystem I (PsaG).

**Suppl. Fig. S3.** Experiment 3. Arabidopsis thylakoid proteins phosphorylated in the presence of 250  $\mu\text{M}$   $\text{Ca}^{2+}$  or 250  $\mu\text{M}$  EGTA. Phosphorylated proteins were revealed with a phosphothreonine specific antibody and subsequently the gel was silver-stained. Identified proteins are the ATPase subunit F (ATPF), subunit Q-1 and Q-2 of photosystem II (PsbQ1-2), subunit H-2 of photosystem I (PsaH-2), subunit N of photosystem I (PsaN) and MAR binding filament-like protein 1 (MFP1).

**Suppl. Fig. S4.** Experiment 4. Arabidopsis thylakoid proteins phosphorylated in the presence of 250  $\mu\text{M}$   $\text{Ca}^{2+}$  or 250  $\mu\text{M}$  EGTA. Phosphorylated proteins were revealed with a Pro-Q Diamond phosphoprotein gel stain and subsequently the gel was silver-stained. Identified proteins are the FtsH protease, Variegated 2 (VAR2), 'Calcium sensing' protein (CAS), subunit H-2 of photosystem I (PsaH-2), subunit N of photosystem I (PsaN; three times identified), subunit P of photosystem I (PsaP) and the ATPase subunit gamma (ATPC1).

**Suppl. Fig. S5.** Experiment 5. Arabidopsis thylakoid proteins phosphorylated in the presence of 25  $\mu\text{M}$   $\text{Ca}^{2+}$  or 25  $\mu\text{M}$  EGTA. Phosphorylated proteins were revealed with a Pro-Q Diamond phosphoprotein gel stain and subsequently the gel was silver-stained. The identified protein is subunit N of photosystem I (PsaN).

**Suppl. Fig. S6.** Experiment 6. Arabidopsis thylakoid proteins phosphorylated in the presence of 25  $\mu\text{M}$   $\text{Ca}^{2+}$  or 25  $\mu\text{M}$  EGTA. Phosphorylated proteins were revealed with a phospho-threonine specific antibody and subsequently the gel was silver-stained. Identified proteins are Plastid transcriptionally active 16 (PTAC16), subunit N of photosystem I (PsaN; twice identified) and ferredoxin:NADP(H) oxidoreductase 2 (FNR2).

**Suppl. Fig.7.** Experiment 7. Arabidopsis thylakoid proteins phosphorylated in the presence of 25  $\mu\text{M}$   $\text{Ca}^{2+}$  or 25  $\mu\text{M}$  EGTA. Phosphorylated proteins were revealed with a phospho-threonine specific antibody and subsequently the gel was silver-stained. Identified proteins are subunit P-1 of photosystem II (PsbP-1), subunit O-1 of photosystem II (PsbO-1), subunit C of photosystem I (PsaC), subunit N of photosystem I (PsaN), the cell cycle control phosphatase superfamily protein (Unknown 1), the chalcone-flavanone isomerase family protein (Unknown 2) and the 3-beta hydroxysteroid dehydrogenase /isomerase family protein (Unknown 3).

Stael et al. Supplementary figure S1

Ca<sup>2+</sup>

EGTA

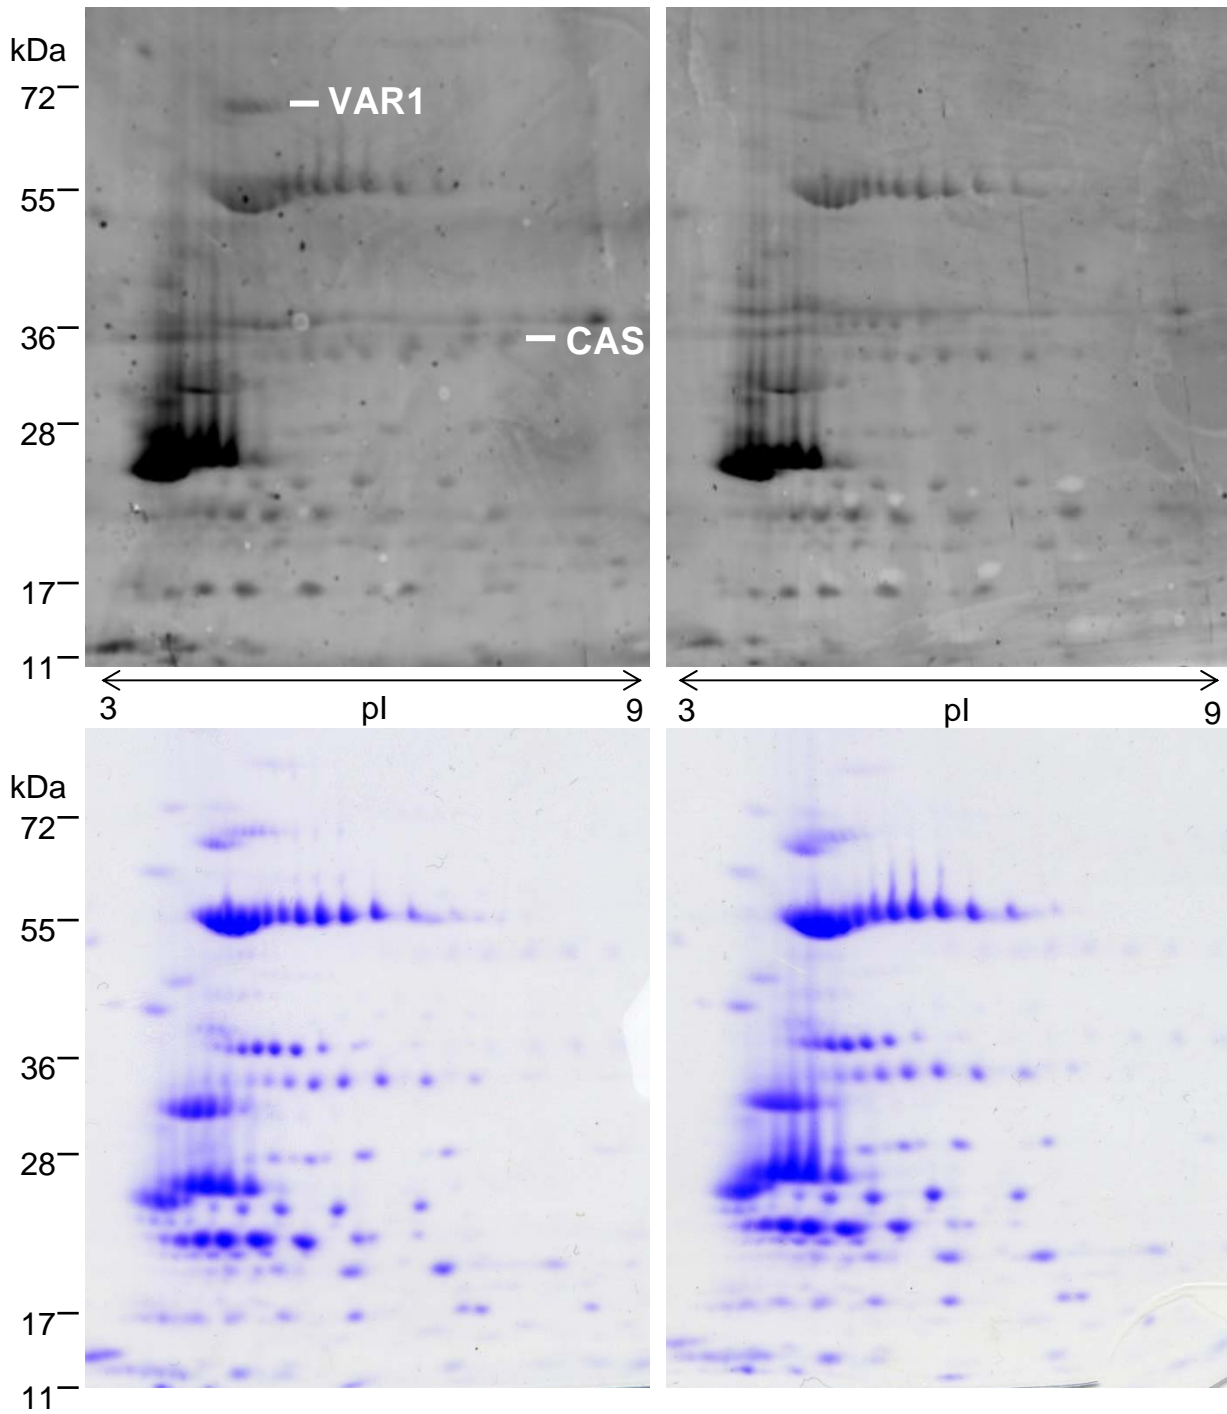

Stael et al. Supplementary figure S2

Ca<sup>2+</sup>

EGTA

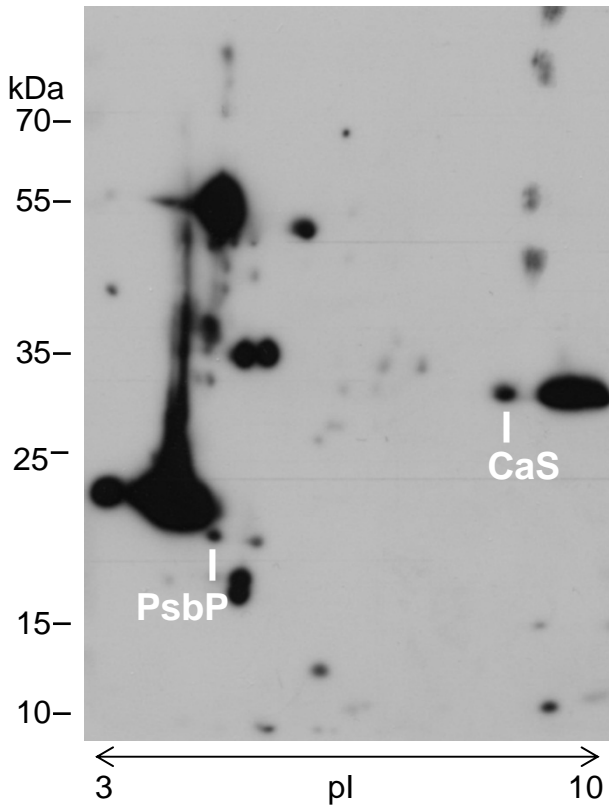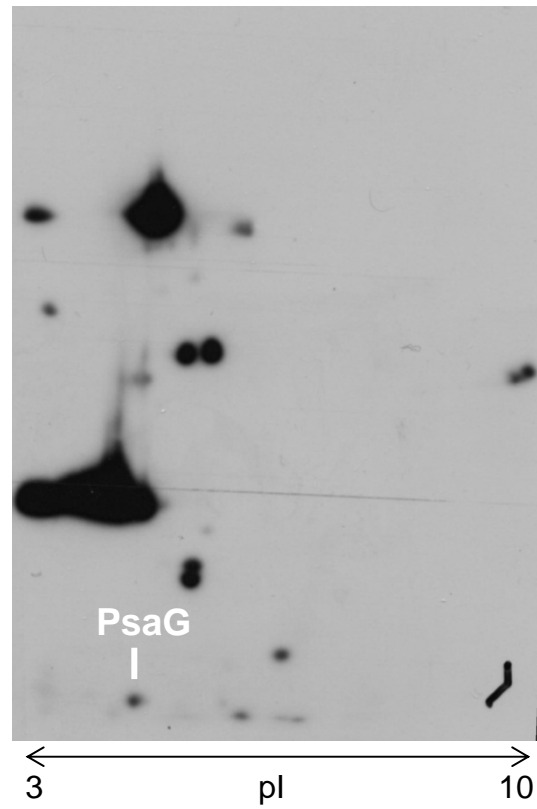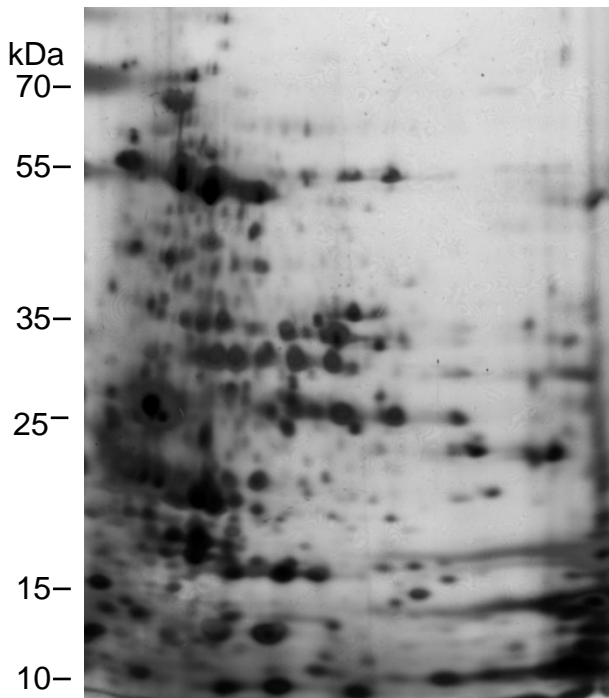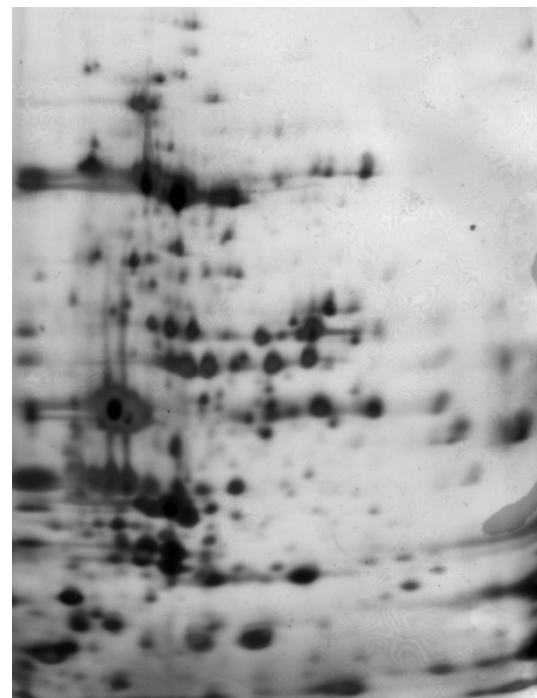

Stael et al. Supplementary figure S3

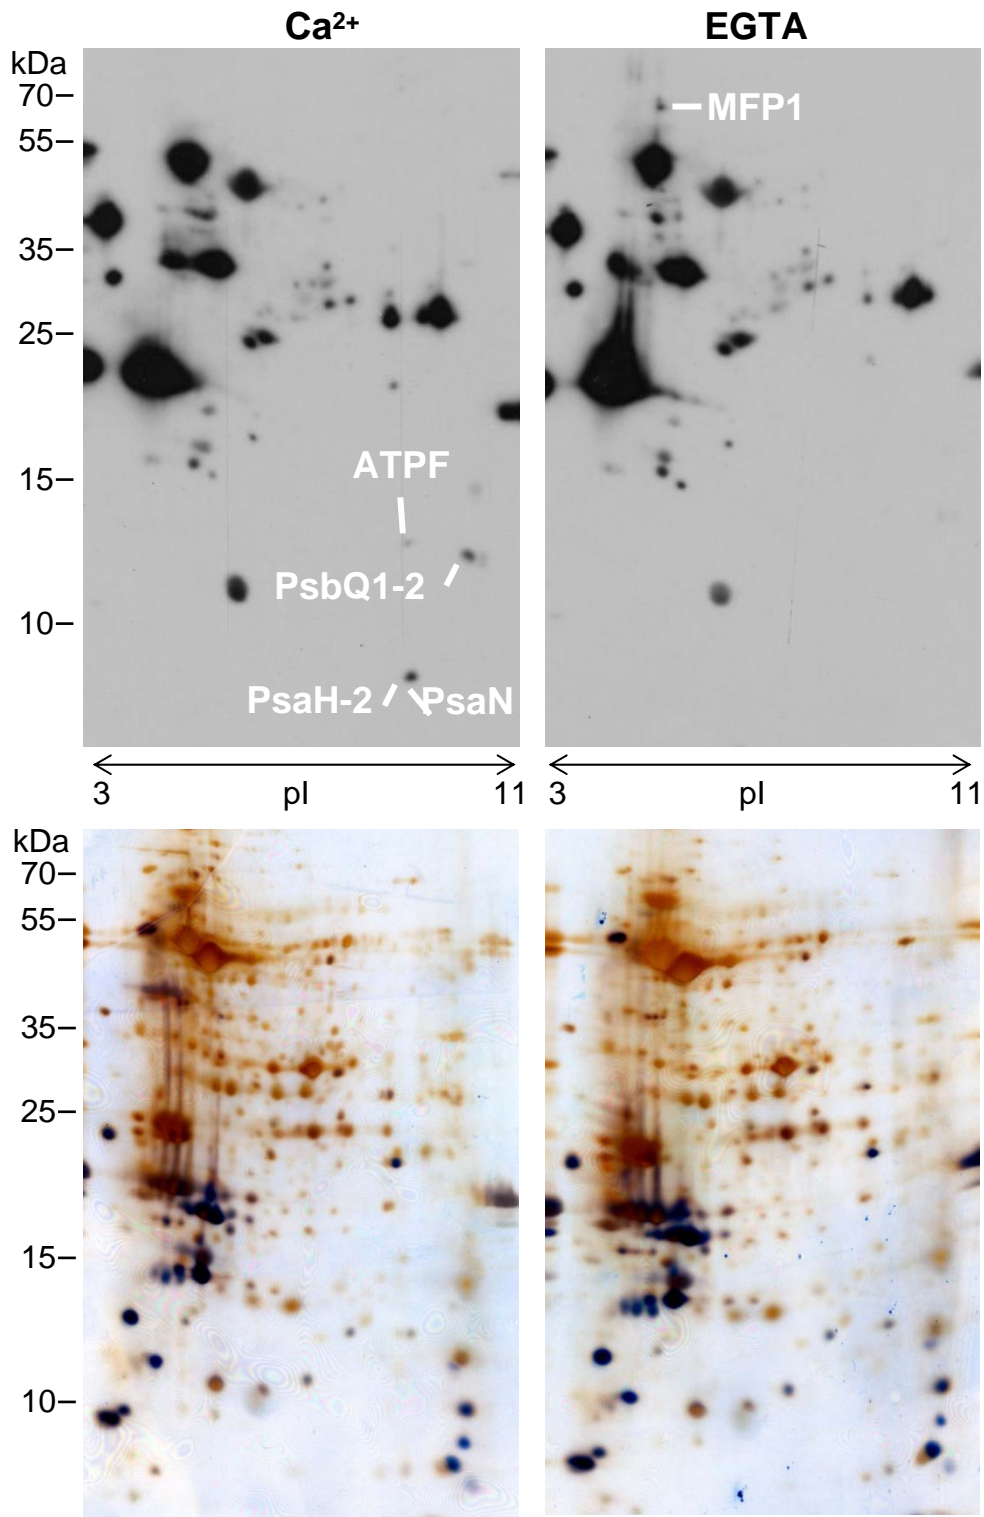

Stael et al. Supplementary figure S4

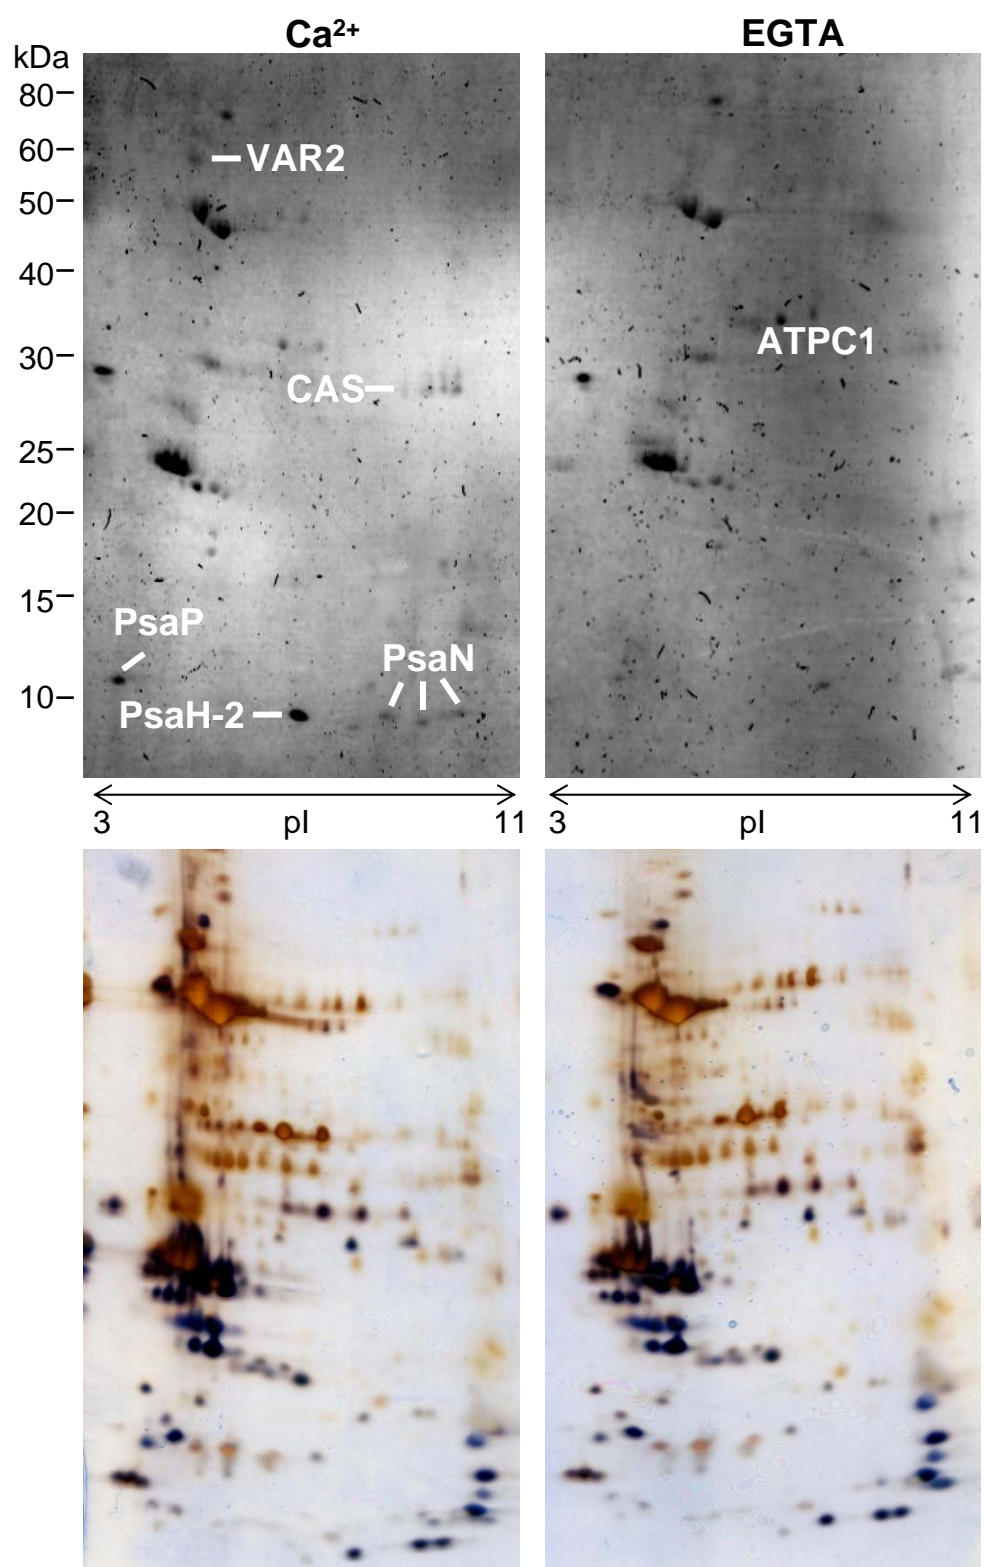



Stael et al. Supplementary figure S5

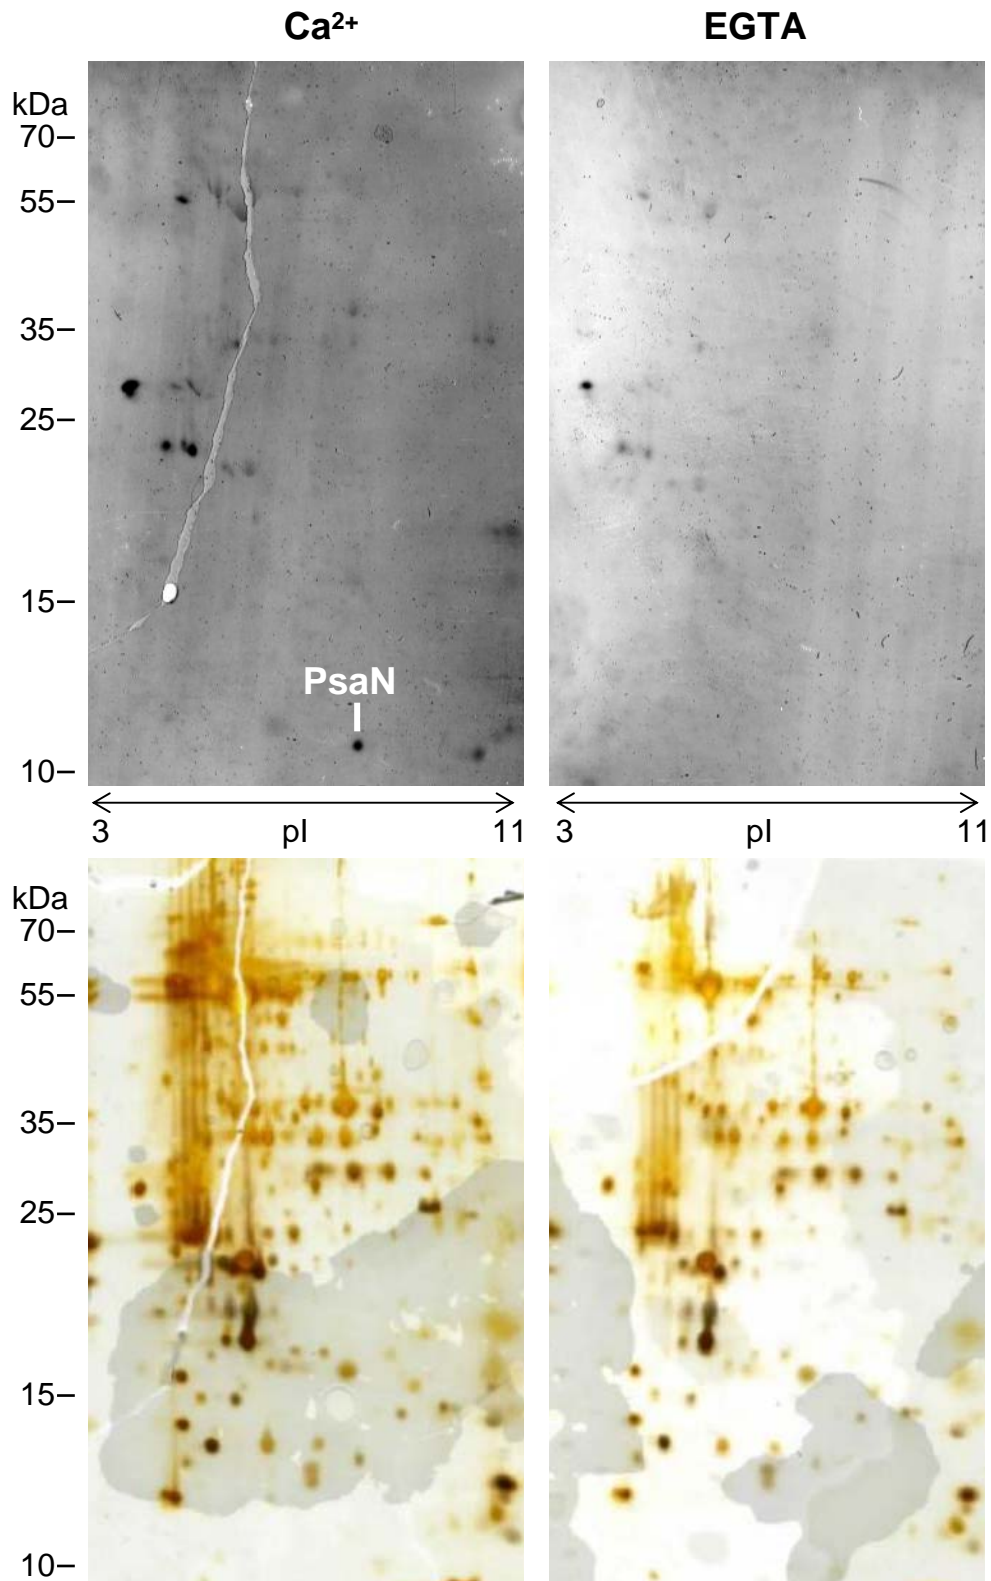



Stael et al. Supplementary figure S6

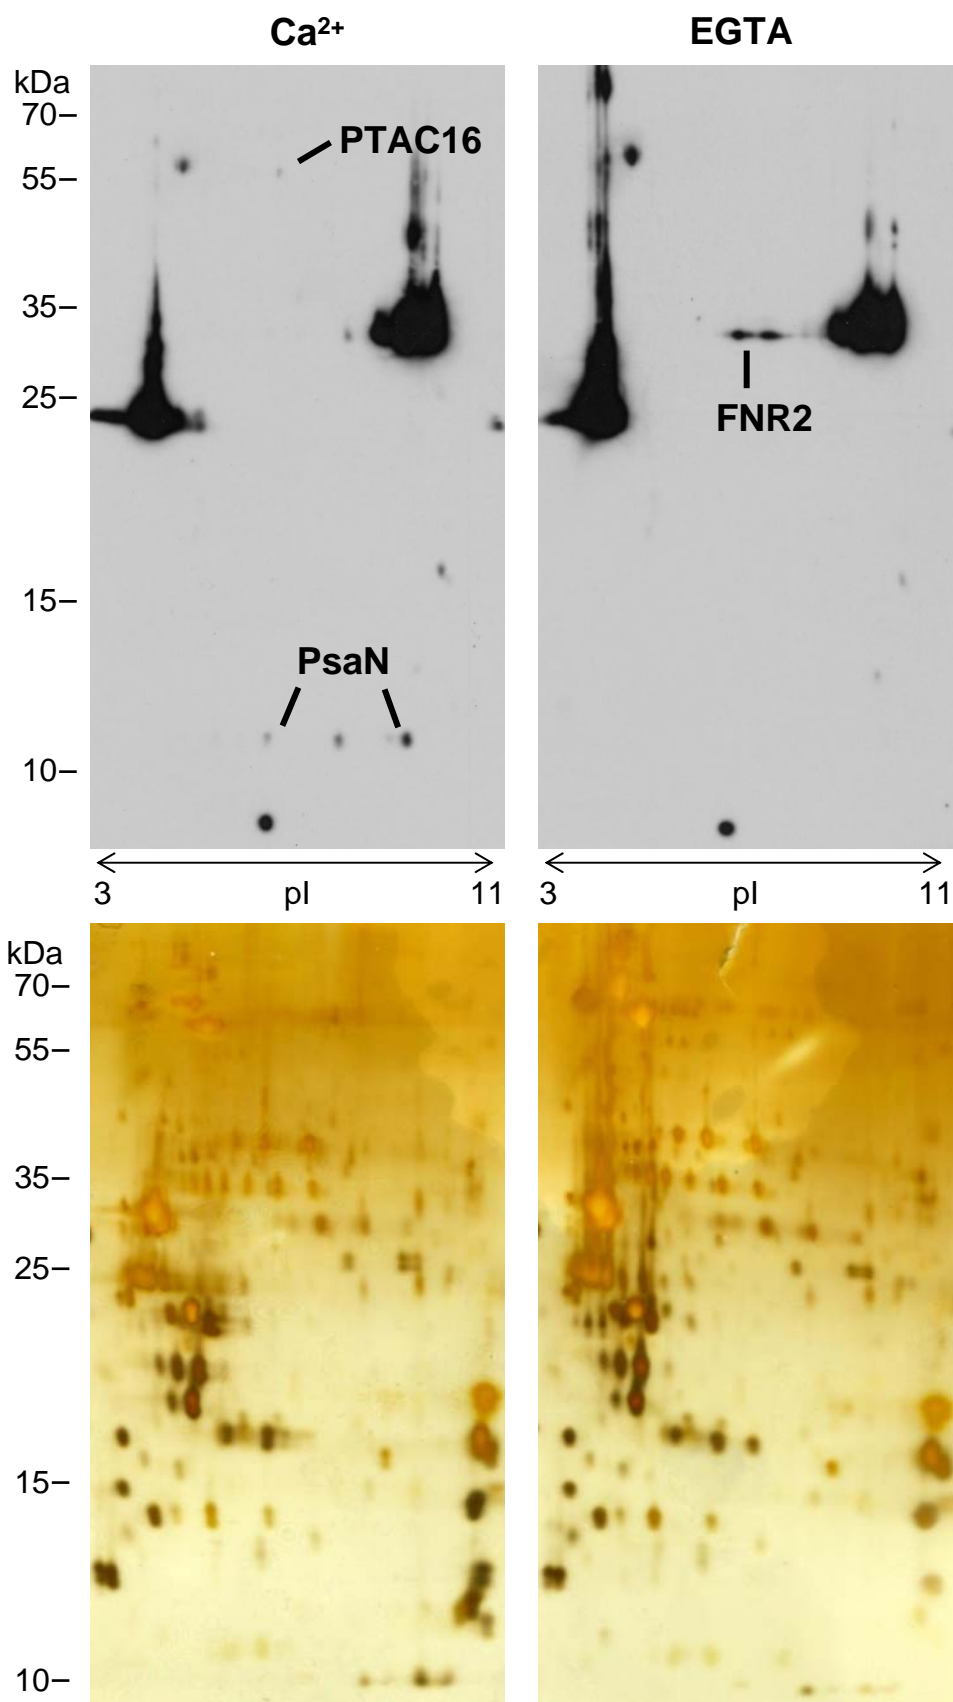

Stael et al. Supplementary figure S7

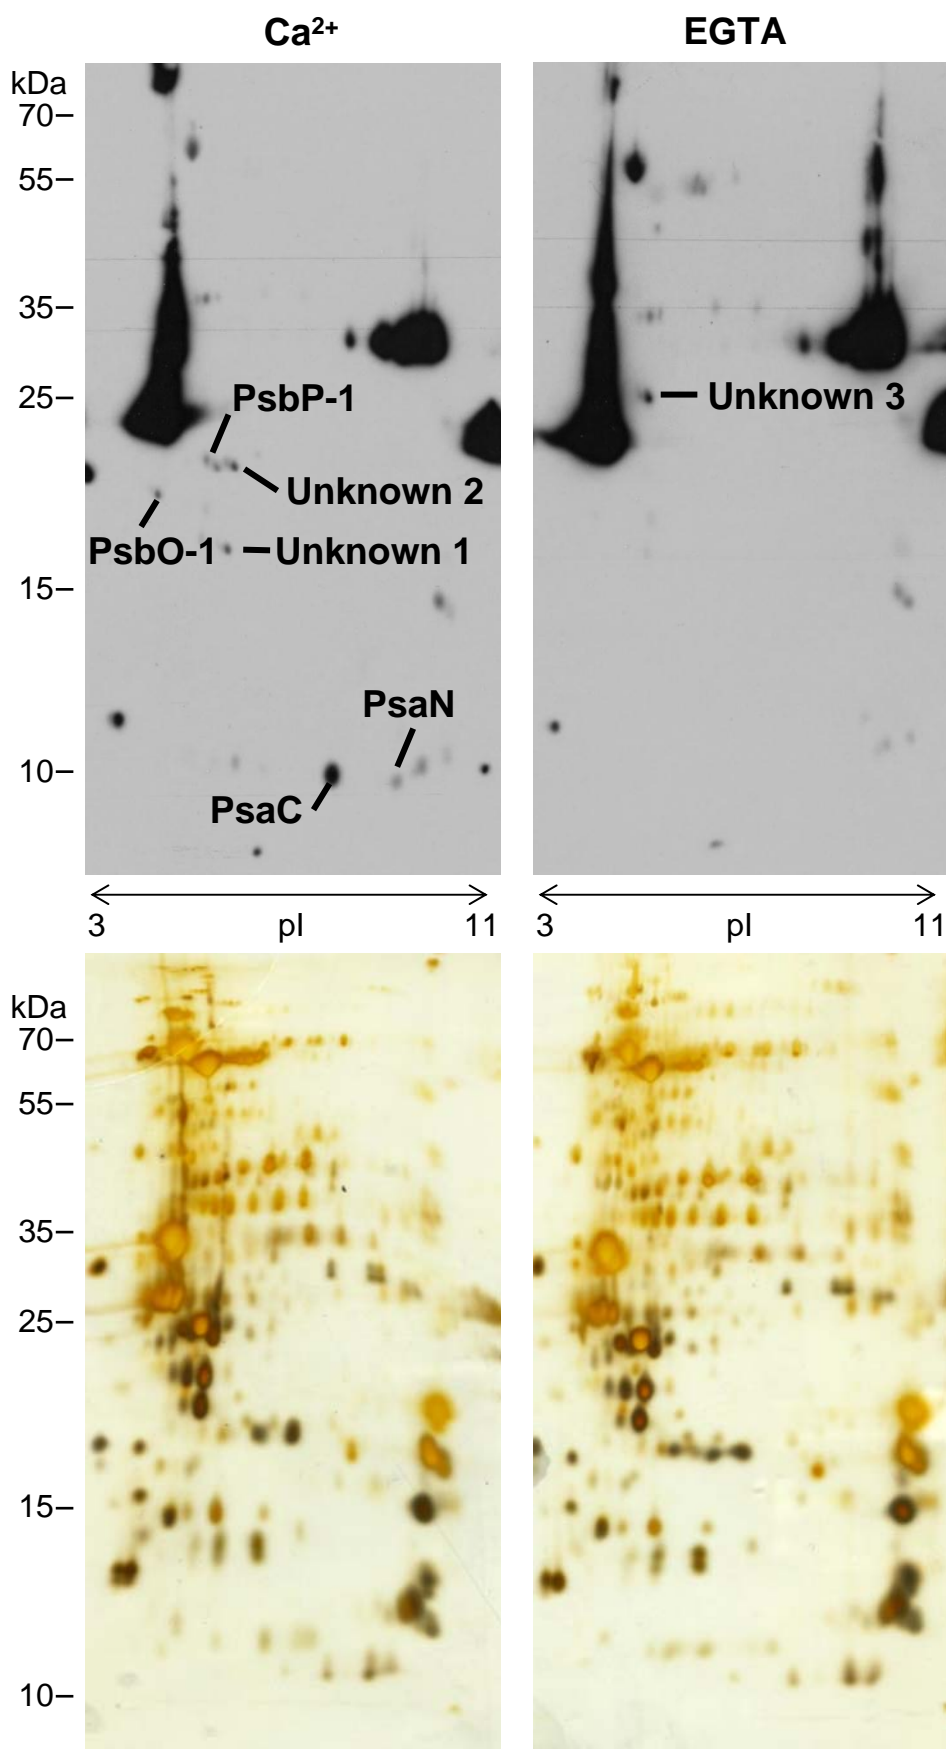

Supplement: NIHMS57578-supplement-Stael_et_al__suppl__data.pdf [file NIHMS57578-supplement-Stael_et_al__suppl__data.pdf]
